# Supplementary material
Source: PubMed Central journal article supplement (PMC1142596)
Supplement: 7600663s3.pdf [file 7600663s3.pdf]

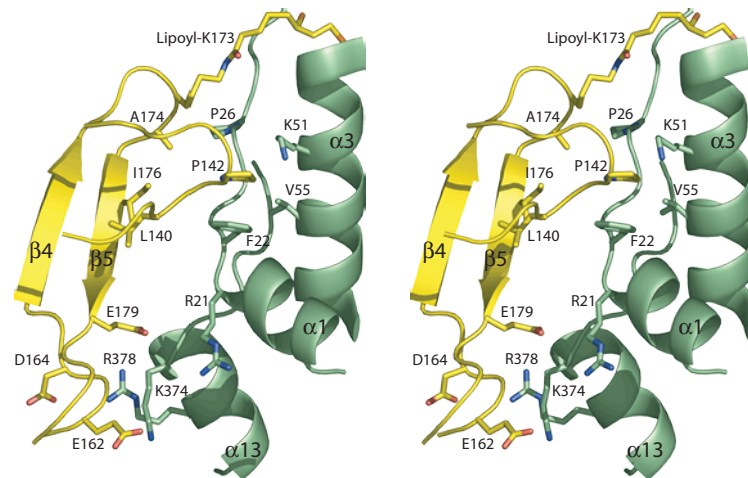

**Supplementary figure S2** Stereo view of the interface between the N-terminal domain of PDK3 and L2

The N-terminal domain of PDK3 (*green*) binds L2 (*yellow*) through hydrophobic and electrostatic interactions. The lipoyl-lysine residue (on top of the figure) and other hydrophobic residues (L140, P142, A174, and I176) surrounding the lipoyl lysine contribute to hydrophobic interactions with conserved residues F22, P26 and V55 as well as side-chain methylene groups of K51 in the N-terminal domain. Conserved acidic residues E162, D164 and E179 and proximal residues E182 and E183 (not shown) of L2 form electrostatic interactions with conserved basic residues R21, K374 and R378 in the lower portion of the PDK3 N-terminal domain.
