# Supplementary material
Source: PubMed Central journal article supplement (PMC1142596)
Supplement: 7600663s4.pdf [file 7600663s4.pdf]

A

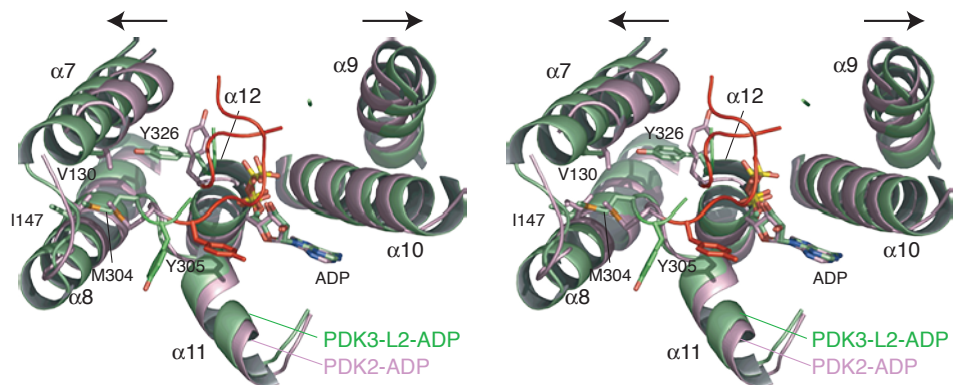

B

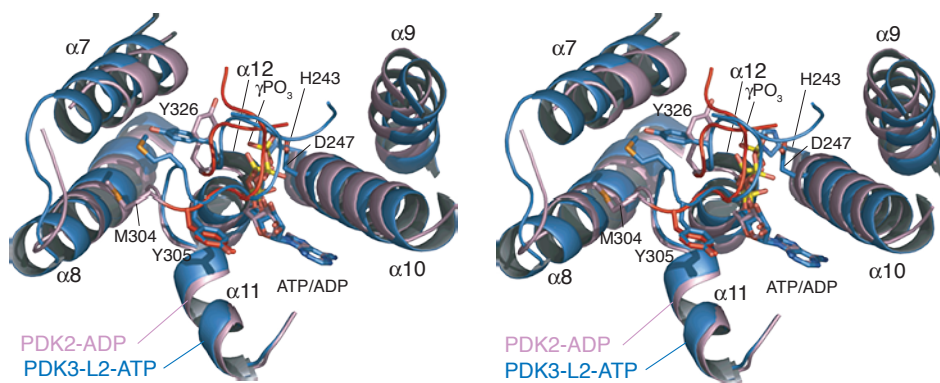

**Supplementary figure S3** Stereo views of L2 binding-induced conformational changes that destabilize the ATP lid

(**A**) The ATP binding sites from the PDK3-L2-ADP (*green*) and PDK2-ADP (*pink*) structures. For details see the figure legend to Figure 7B in the text. (**B**) The active sites of the PDK3-L2-ATP (*blue*) and PDK2-ADP (*pink*) structures. For details see the figure legend to Figure 7C in the text.
