# Supplementary material
Source: PubMed Central journal article supplement (PMC1142596)
Supplement: 7600663s5.pdf [file 7600663s5.pdf]

**Supplementary table SI** Interactions between phosphate groups of the bound nucleotides and the ATP lid of PDK3

| <b>ADP</b>  |          |              | <b>ATP</b>  |          |              |
|-------------|----------|--------------|-------------|----------|--------------|
| ADP         | PDK3     | Distance (Å) | ATP         | PDK3     | Distance (Å) |
| O1 $\alpha$ | L328 N   | 3.09         | O1 $\alpha$ | N251 ND2 | 3.16         |
| O2 $\alpha$ | N251 OD1 | 3.26         |             | N251 OD1 | 2.70         |
| O1 $\beta$  | F324 O   | 2.84         | O2 $\alpha$ | L328 N   | 2.91         |
| O3 $\beta$  | N251 OD1 | 3.19         | O1 $\beta$  | S306 OG  | 2.74         |
|             | R254 NH2 | 2.70         | O2 $\beta$  | N251 OD1 | 3.02         |
|             |          |              | O3 $\beta$  | G323 N   | 3.27         |
|             |          |              | O1 $\gamma$ | G325 N   | 2.85         |
|             |          |              |             | Y326 N   | 2.80         |
|             |          |              | O2 $\gamma$ | G327 N   | 3.28         |
|             |          |              |             | E247 OE1 | 3.27         |

Distances were calculated using the program CONTACT in the CCP4 package (Collaborative Computational Project, 1994).
